# Supplementary material
Source: PubMed Central journal article supplement (PMC3321601)
Supplement: mt201238x2.pdf [file mt201238x2.pdf]

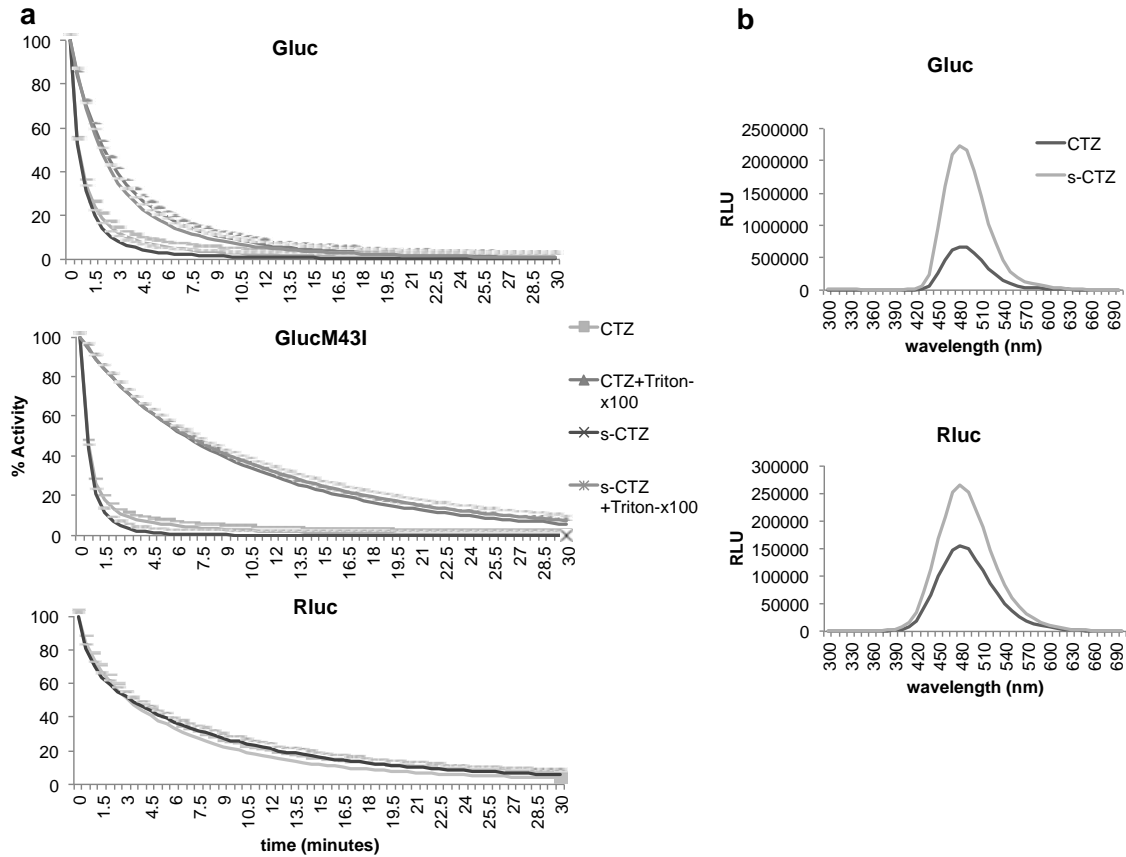

**Supplementary figure 1. Time kinetics of Gluc and Rluc light production using s-CTZ.** (a) 20  $\mu$ l aliquots of conditioned medium from cells expressing Gluc or GlucM43I (in the presence or absence of 0.1% Triton-X100) and lysates from cells expressing Rluc were analyzed for light production using s-CTZ and native CTZ over time. Signals were calculated as % RLU of which 100% corresponds to the signal obtained at the first time point. (b) Light emission spectra for Gluc and Rluc catalyzed by both s-CTZ and CTZ.
